# Supplementary material for: Structural dynamics of E. coli single-stranded DNA binding protein reveal DNA wrapping and unwrapping pathways
Source: eLife journal article supplement (doi:10.7554/elife.08193), 2015-08-25
Supplement: supp [file elife-08193-supp-v1.zip]

Archive with 14 entries (14 files):
- elife_poa_e08193_Figure_1_figure_supplement_5.pdf
- elife_poa_e08193_Figure_3_figure_supplement_3.pdf
- elife_poa_e08193_Figure_6_figure_supplement_1.pdf
- elife_poa_e08193_Figure_1_figure_supplement_1.pdf
- elife_poa_e08193_Figure_3_figure_supplement_2.pdf
- elife_poa_e08193_Figure_1_figure_supplement_3.pdf
- elife_poa_e08193_Figure_1_figure_supplement_2.pdf
- elife_poa_e08193_Figure_5_figure_supplement_1.pdf
- elife_poa_e08193_Figure_3_figure_supplement_1.pdf
- elife_poa_e08193_Figure_4_figure_supplement_1.pdf
- elife_poa_e08193_Figure_1_figure_supplement_4.pdf
- elife_poa_e08193_Figure_2_figure_supplement_1.pdf
- elife_poa_e08193_Figure_6_figure_supplement_2.pdf
- elife_poa_e08193_Figure_1_figure_supplement_6.pdf
