# Supplementary figures and images for: Structural dynamics of E. coli single-stranded DNA binding protein reveal DNA wrapping and unwrapping pathways
Source: eLife journal article supplement (doi:10.7554/elife.08193), 2015-08-25

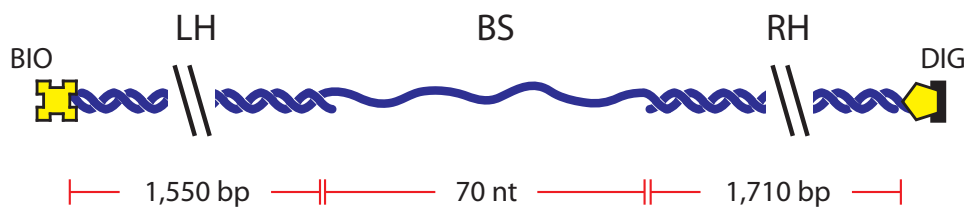

Figure 1 Supp. 5

Supplement: supp [file elife-08193-supp-v1.zip › elife_poa_e08193_Figure_1_figure_supplement_5.pdf]

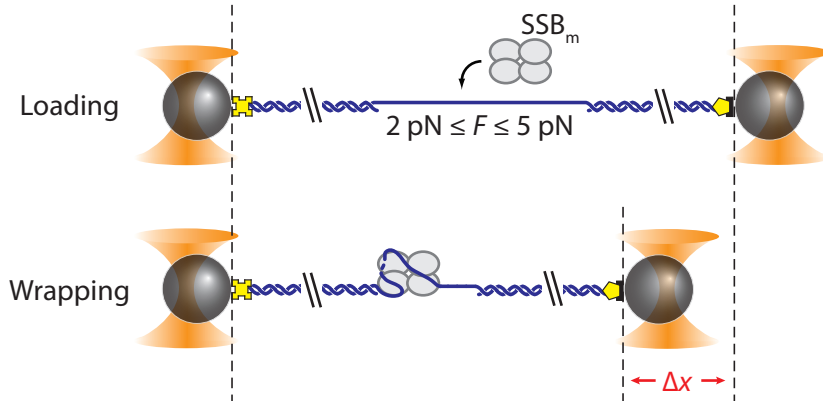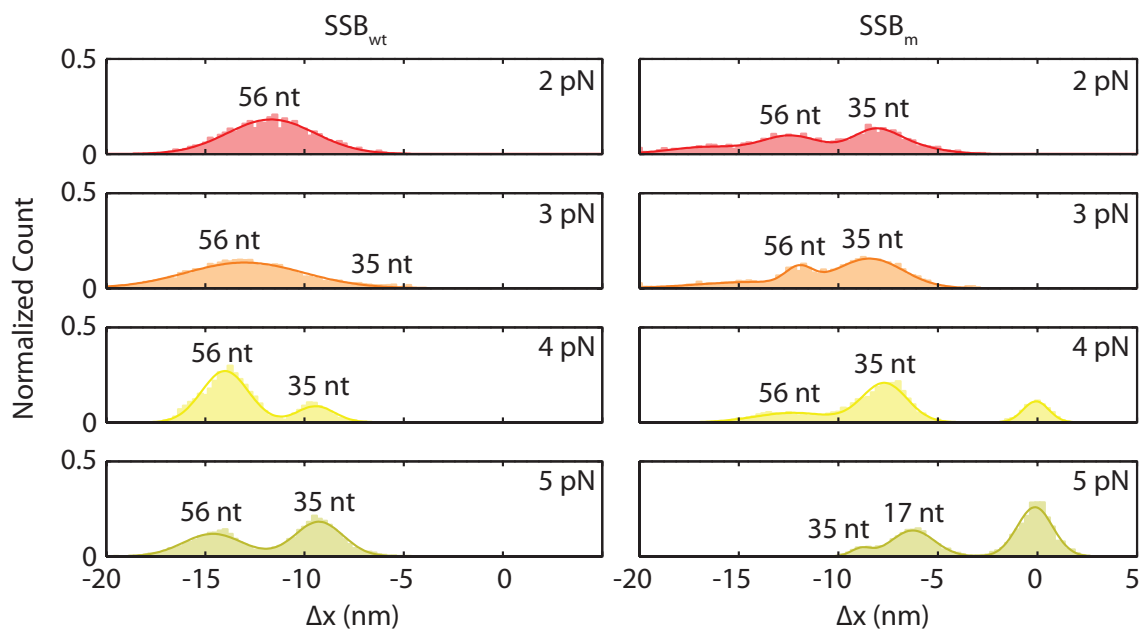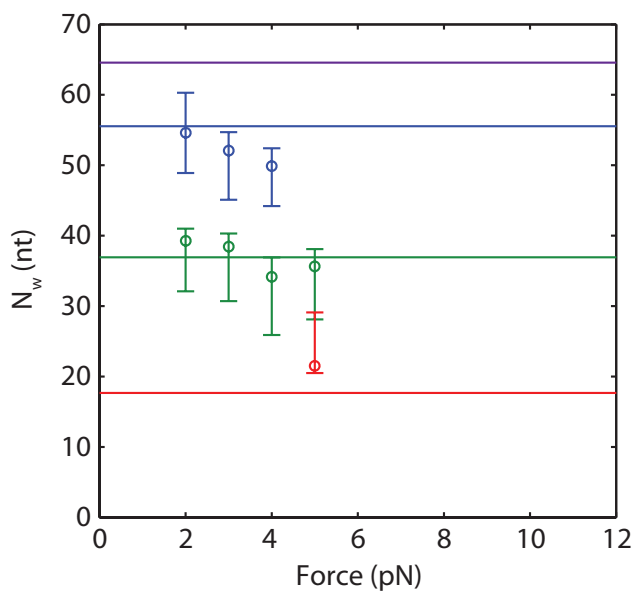

Supplement: supp [file elife-08193-supp-v1.zip › elife_poa_e08193_Figure_3_figure_supplement_3.pdf]

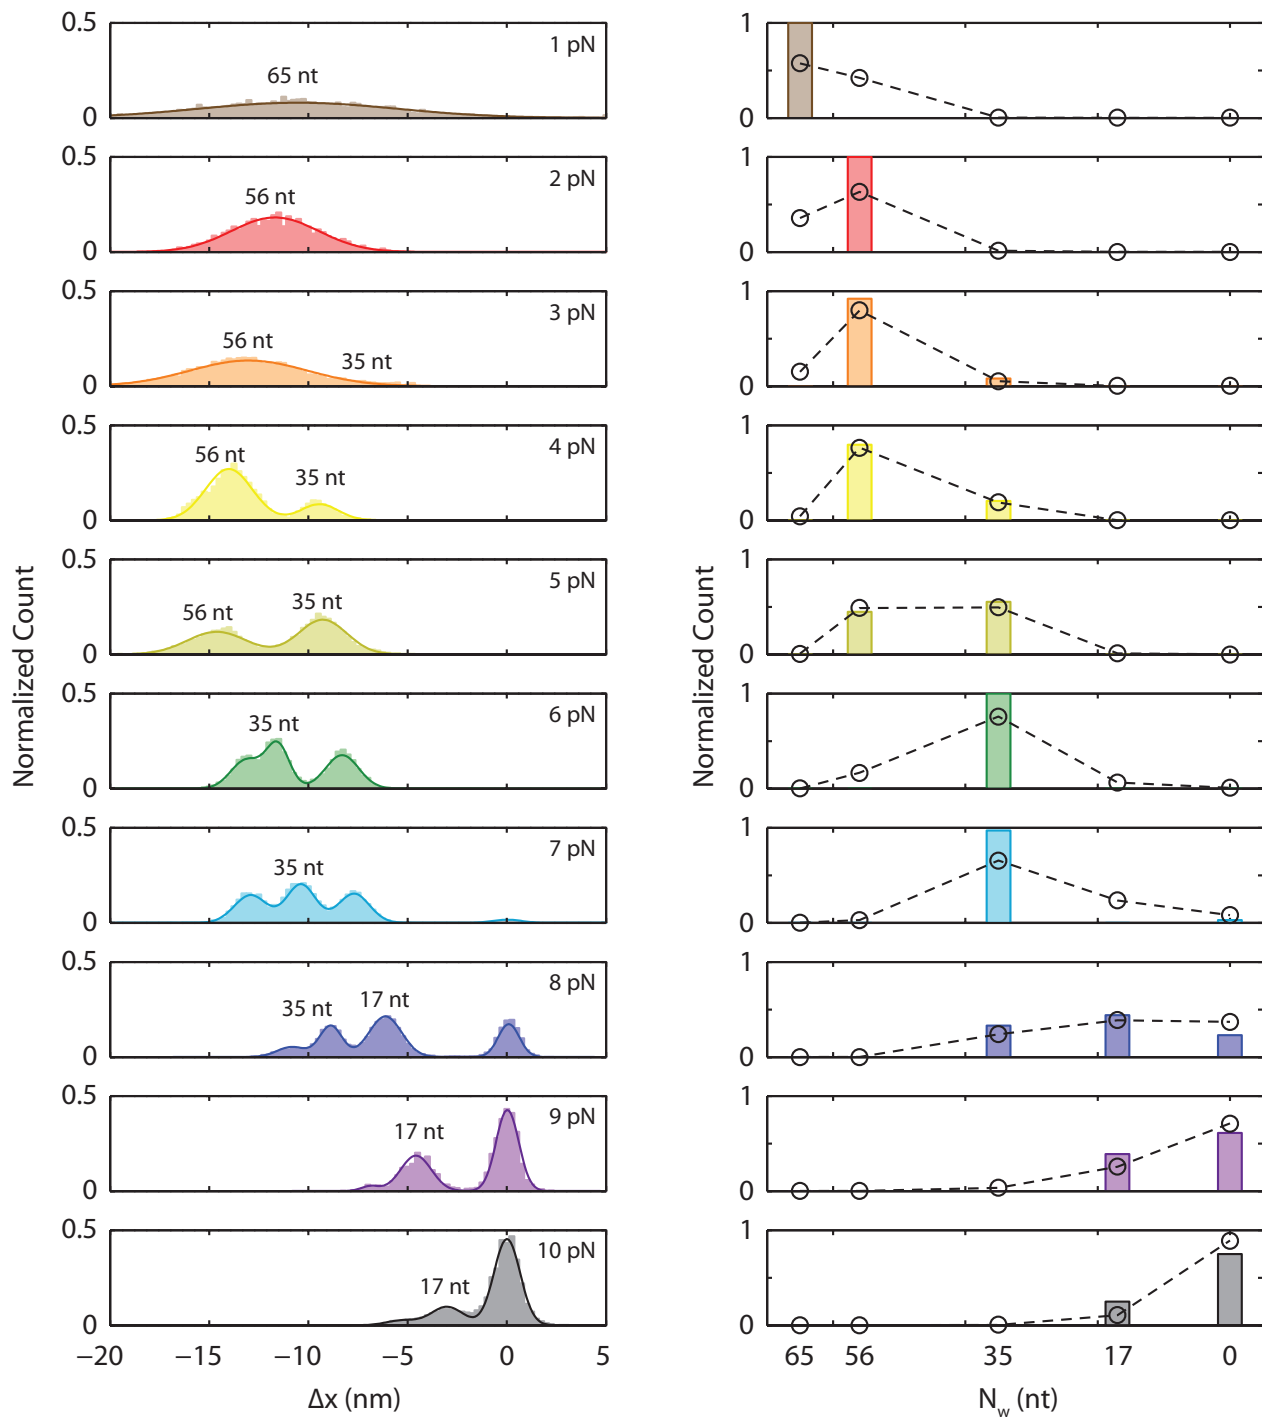

Figure 6 Supp. 1

Supplement: supp [file elife-08193-supp-v1.zip › elife_poa_e08193_Figure_6_figure_supplement_1.pdf]

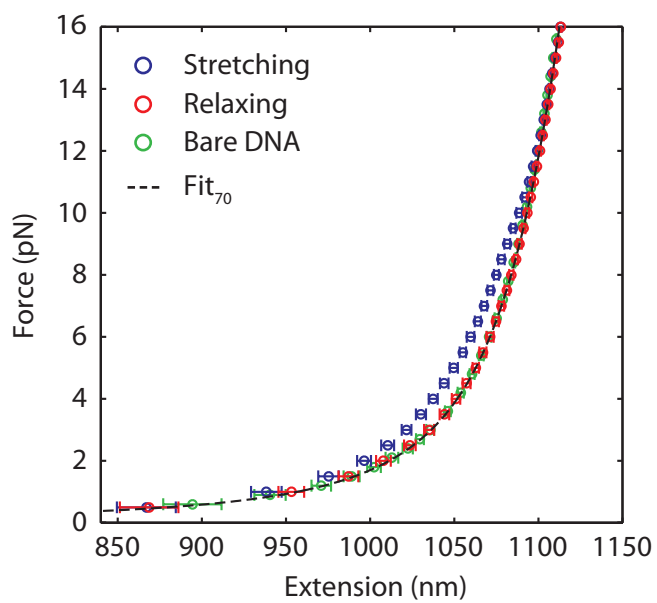

Figure 1 Supp. 1

Supplement: supp [file elife-08193-supp-v1.zip › elife_poa_e08193_Figure_1_figure_supplement_1.pdf]

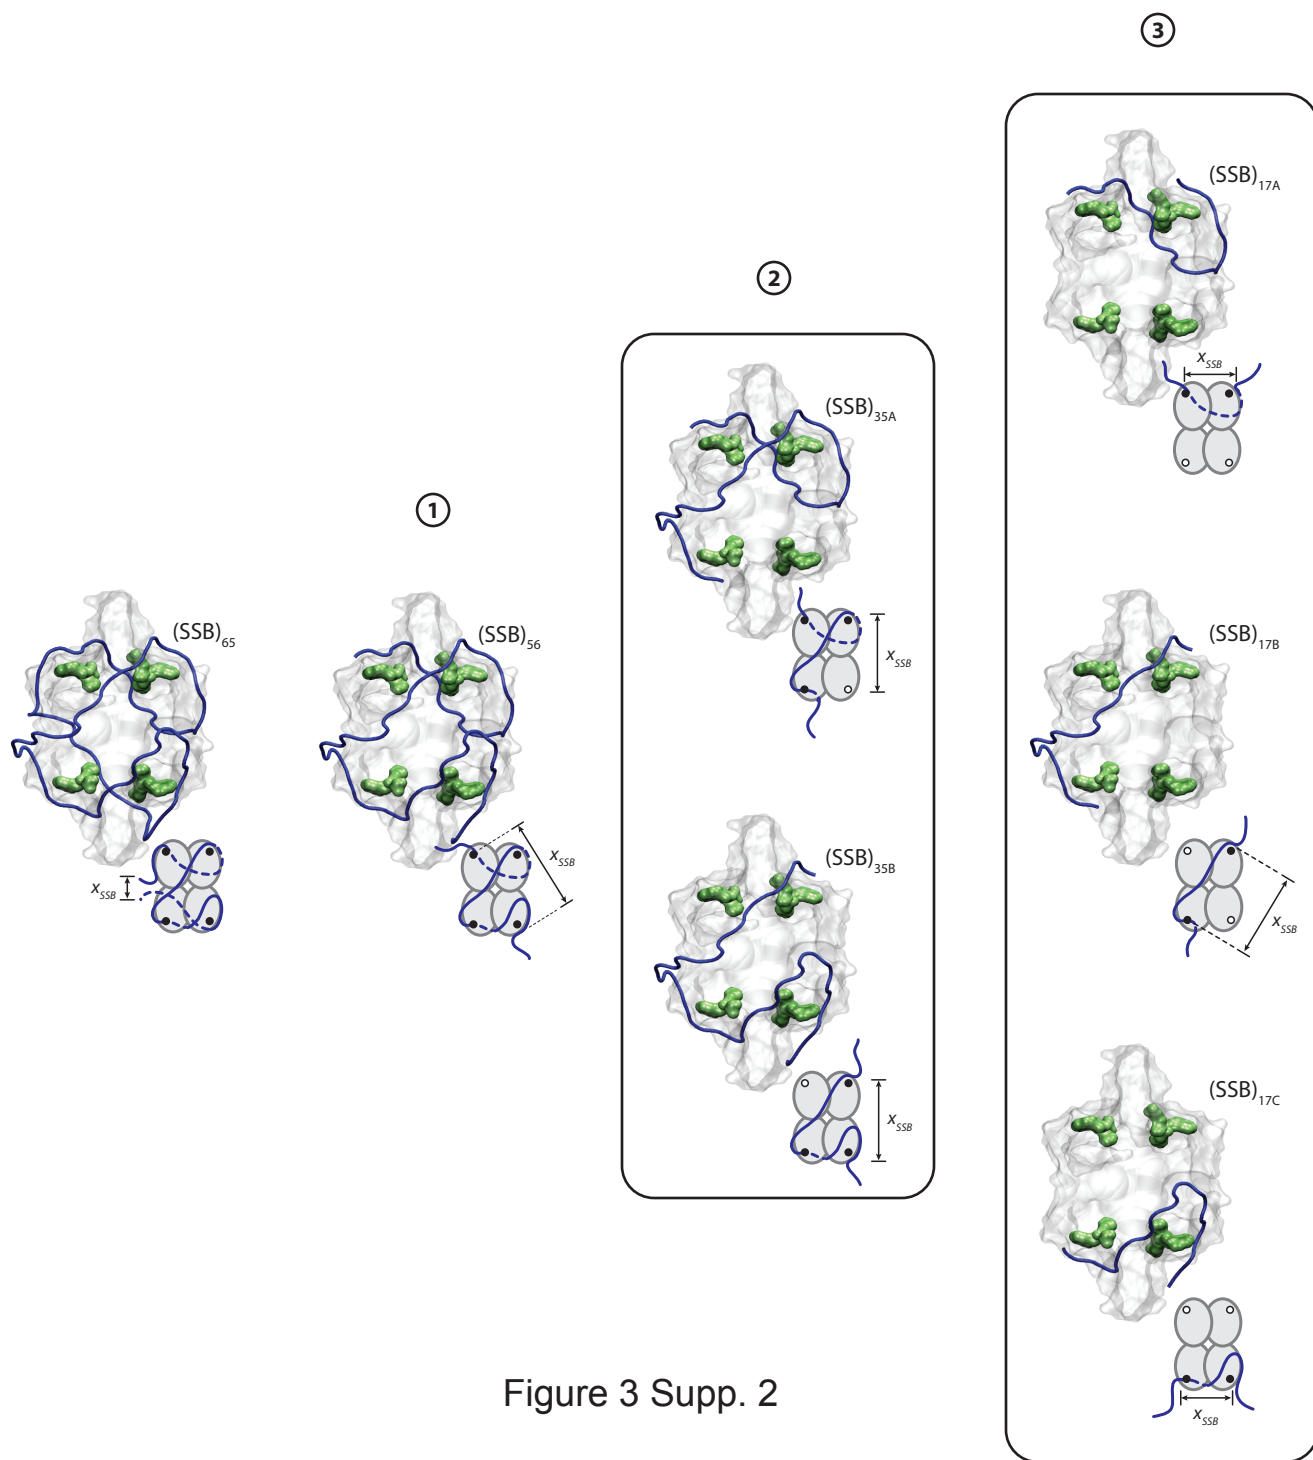

Figure 3 Supp. 2

Supplement: supp [file elife-08193-supp-v1.zip › elife_poa_e08193_Figure_3_figure_supplement_2.pdf]

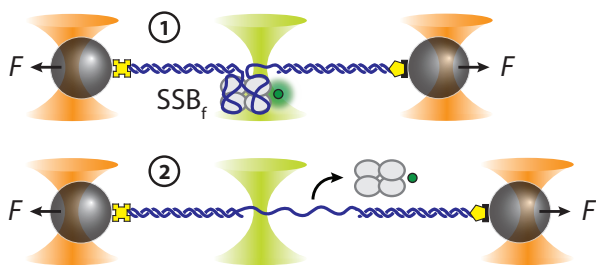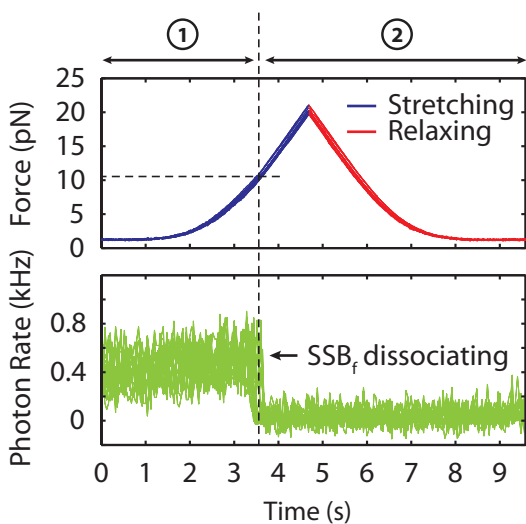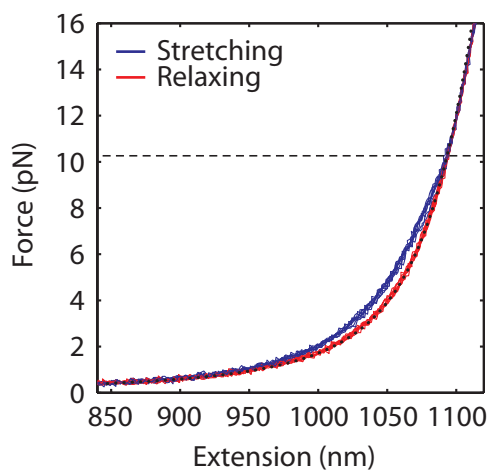

Figure 1 Supp. 3

Supplement: supp [file elife-08193-supp-v1.zip › elife_poa_e08193_Figure_1_figure_supplement_3.pdf]

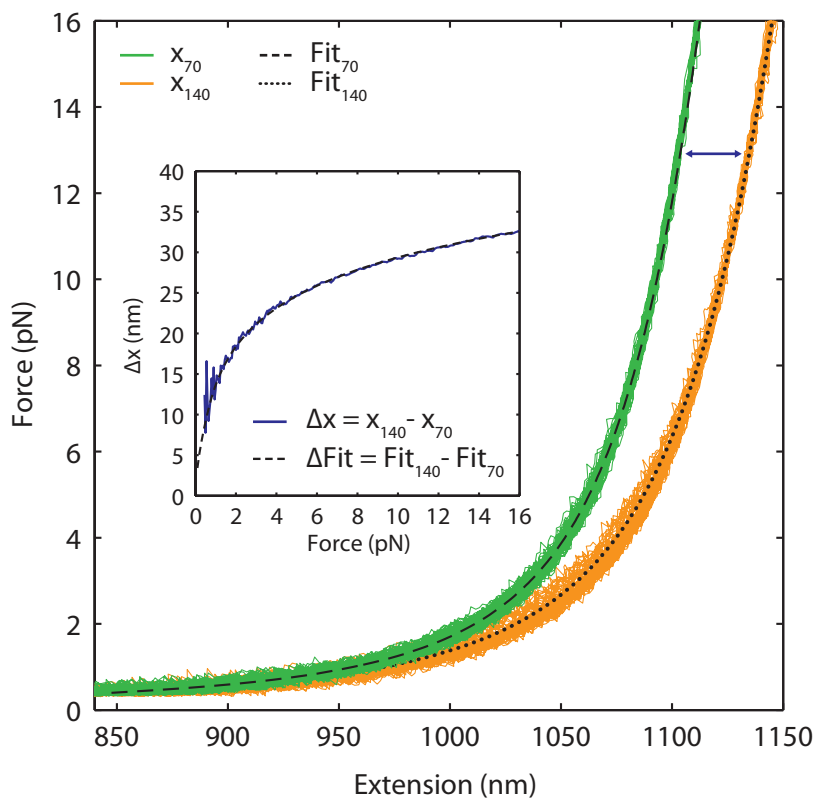

Figure 1 Supp. 2

Supplement: supp [file elife-08193-supp-v1.zip › elife_poa_e08193_Figure_1_figure_supplement_2.pdf]

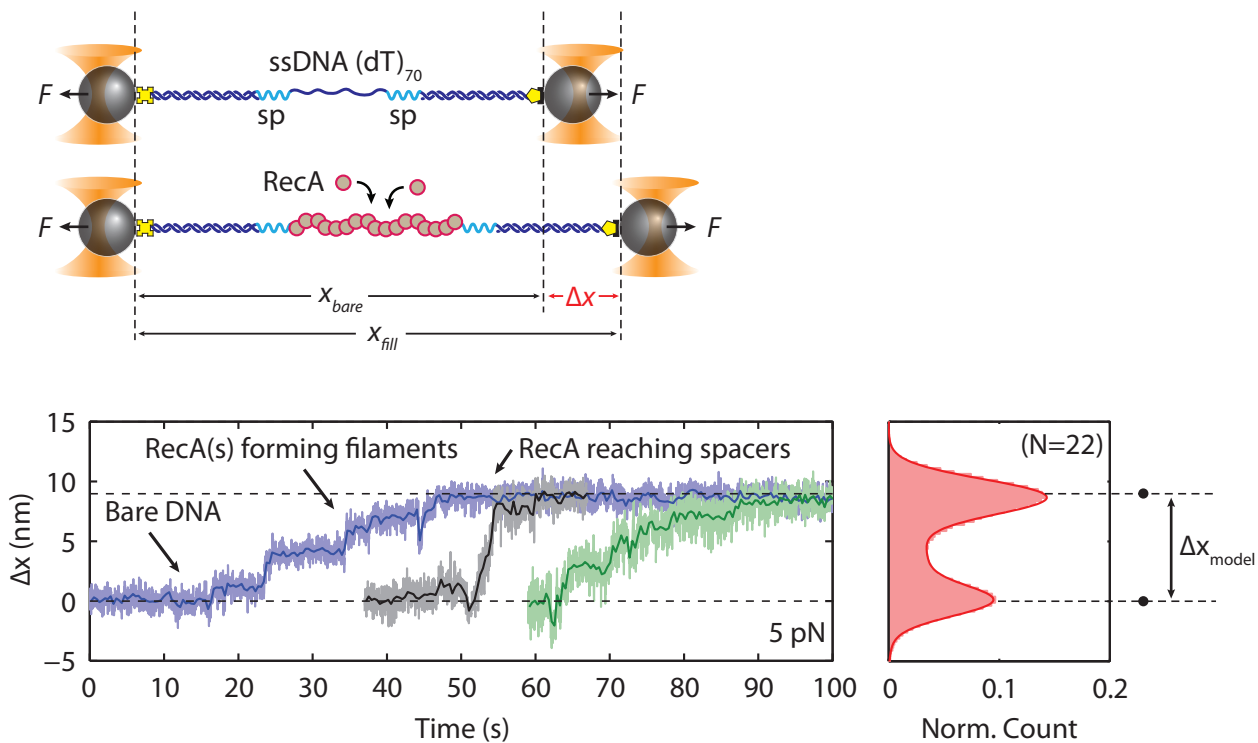

Figure 5 Supp. 1

Supplement: supp [file elife-08193-supp-v1.zip › elife_poa_e08193_Figure_5_figure_supplement_1.pdf]

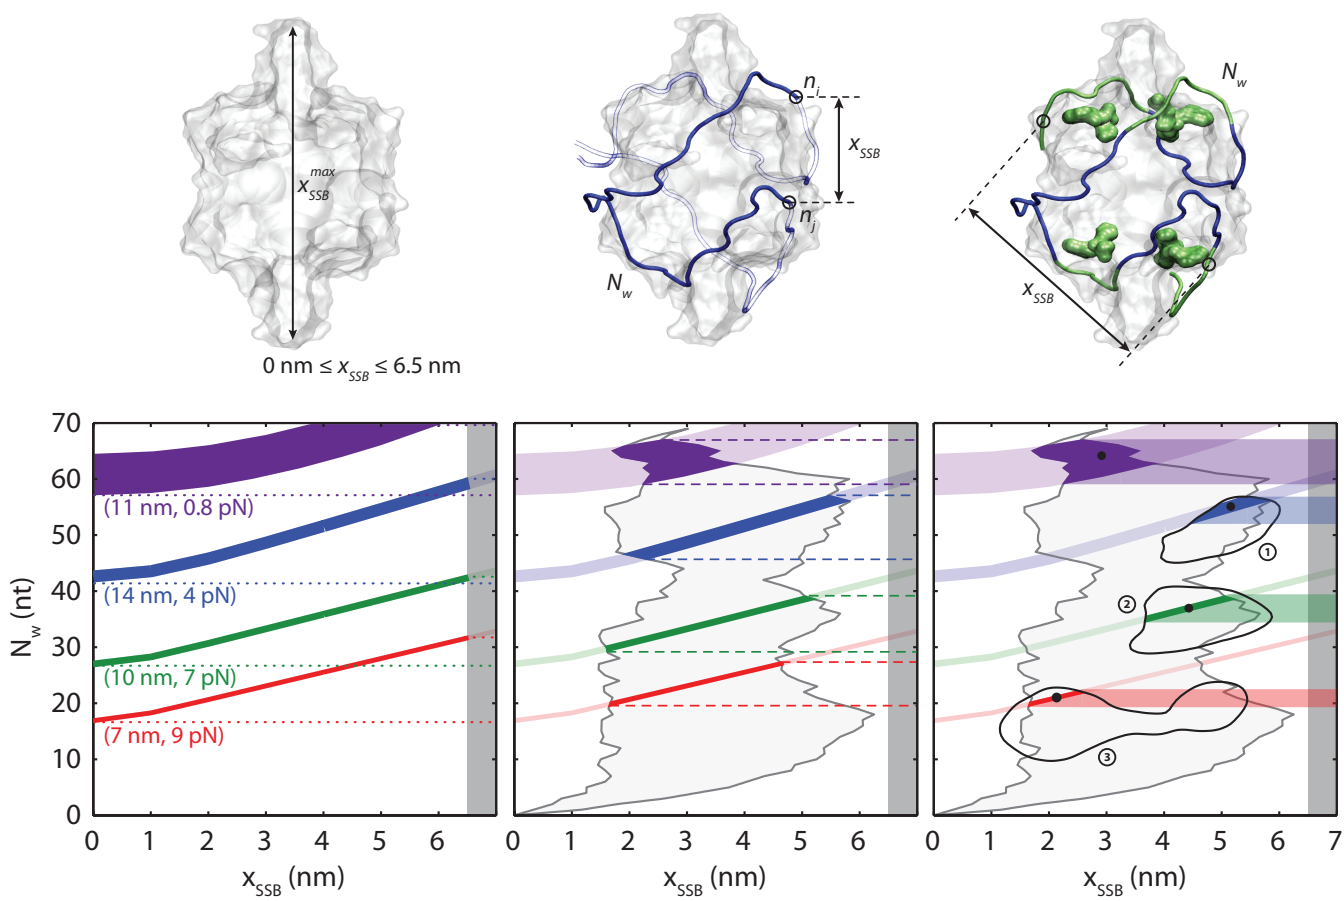

Figure 3 Supp. 1

Supplement: supp [file elife-08193-supp-v1.zip › elife_poa_e08193_Figure_3_figure_supplement_1.pdf]

Sliding Mechanism

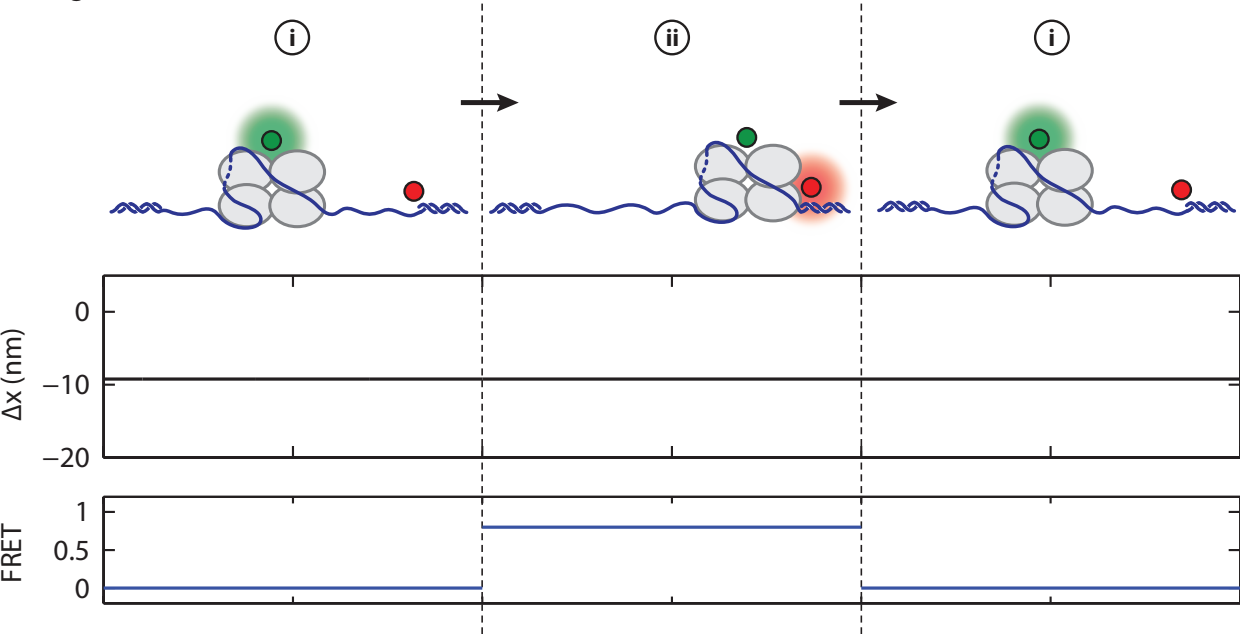

Rolling Mechanism

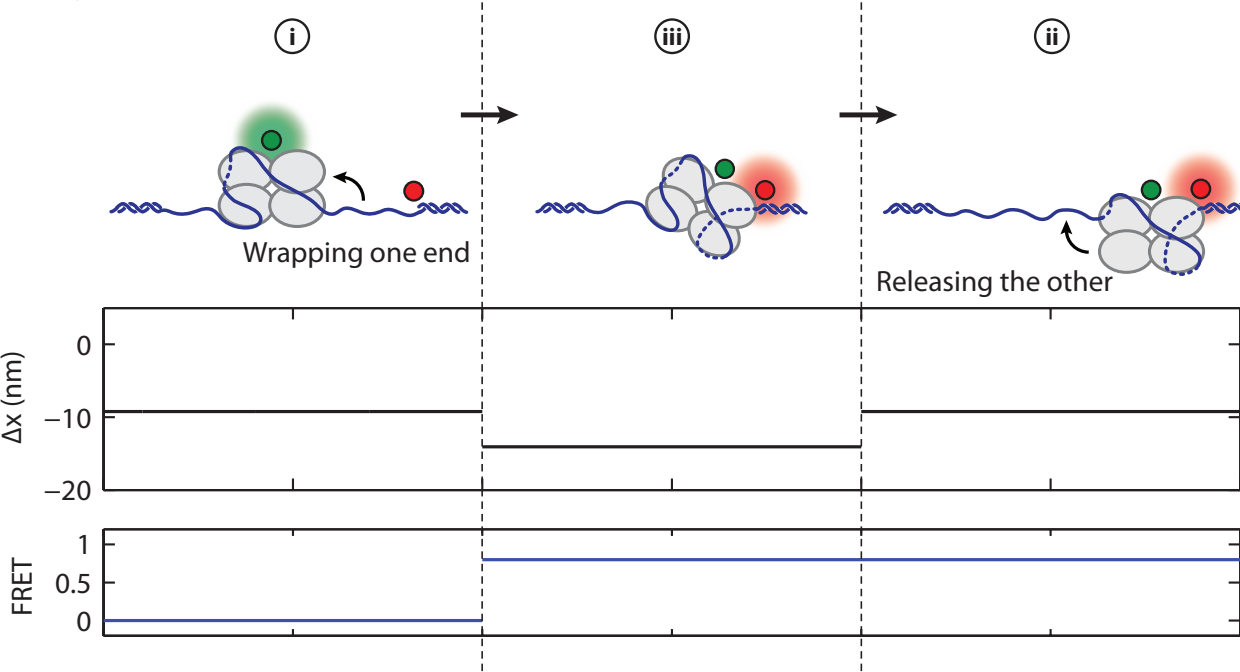

Figure 4 Supp. 1

Supplement: supp [file elife-08193-supp-v1.zip › elife_poa_e08193_Figure_4_figure_supplement_1.pdf]

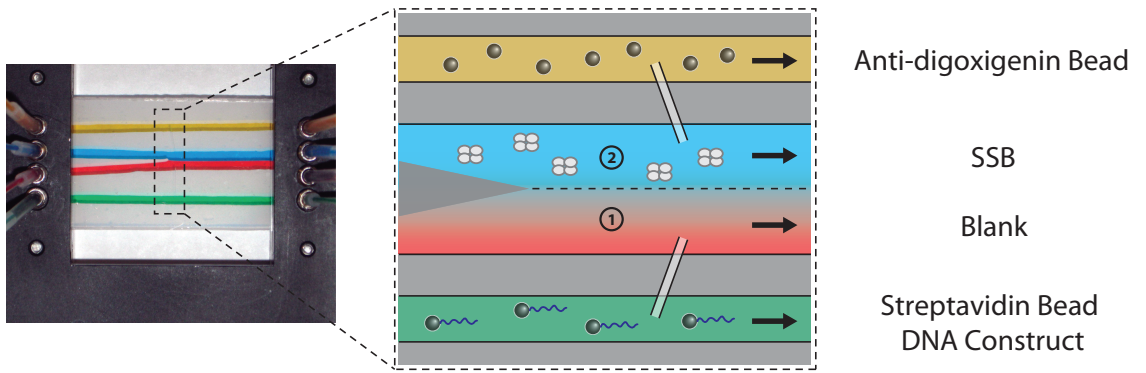

Figure 1 Supp. 4

Supplement: supp [file elife-08193-supp-v1.zip › elife_poa_e08193_Figure_1_figure_supplement_4.pdf]

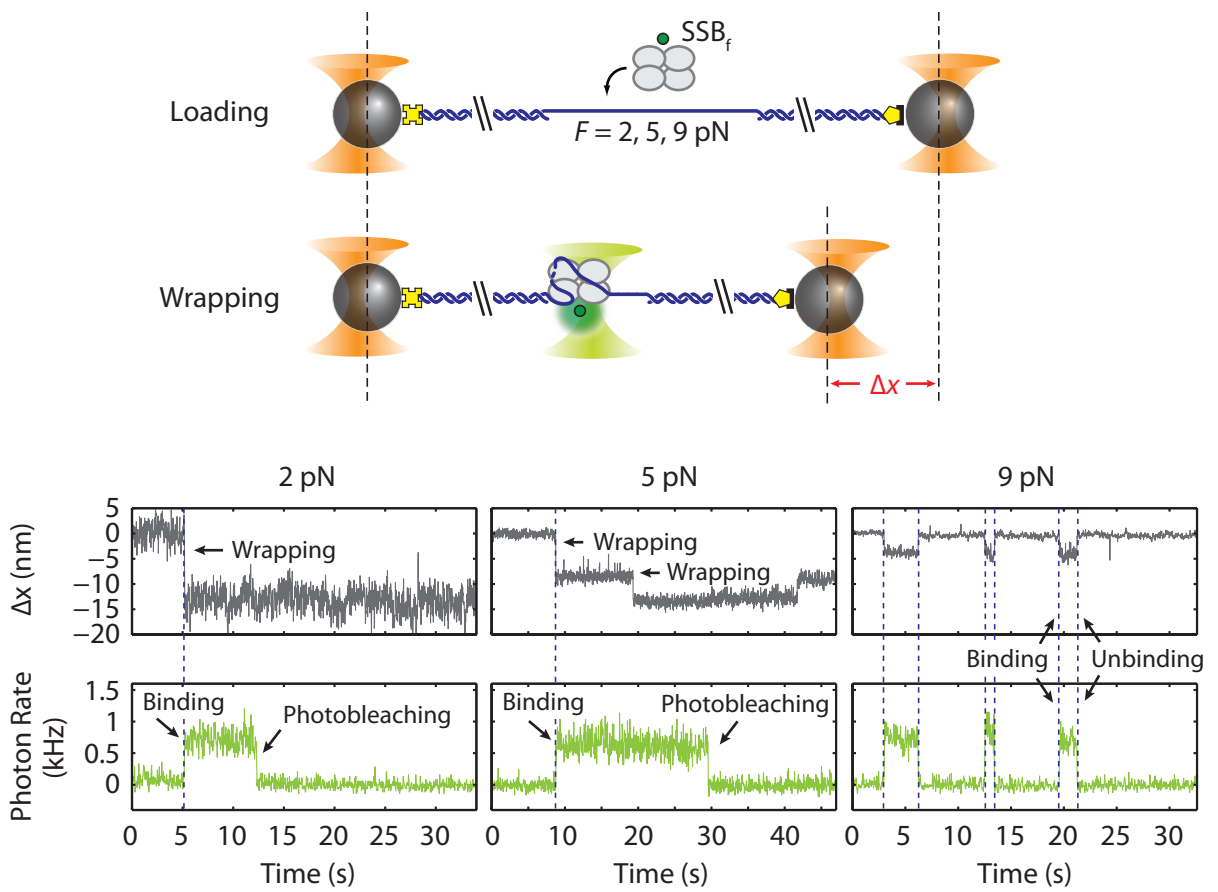

Figure 2 Supp. 1

Supplement: supp [file elife-08193-supp-v1.zip › elife_poa_e08193_Figure_2_figure_supplement_1.pdf]

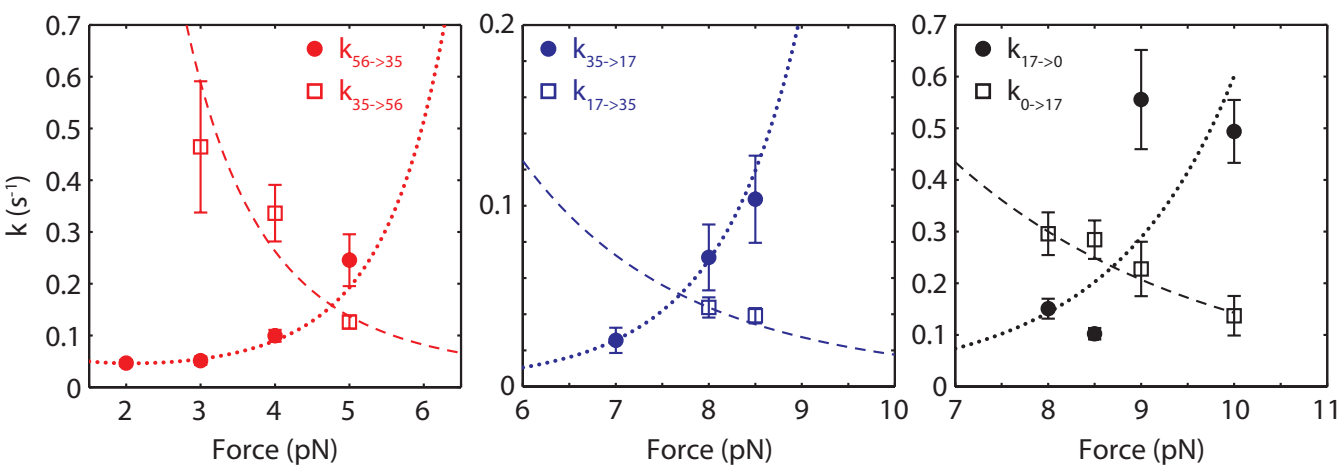

Figure 6 Supp. 2

Supplement: supp [file elife-08193-supp-v1.zip › elife_poa_e08193_Figure_6_figure_supplement_2.pdf]

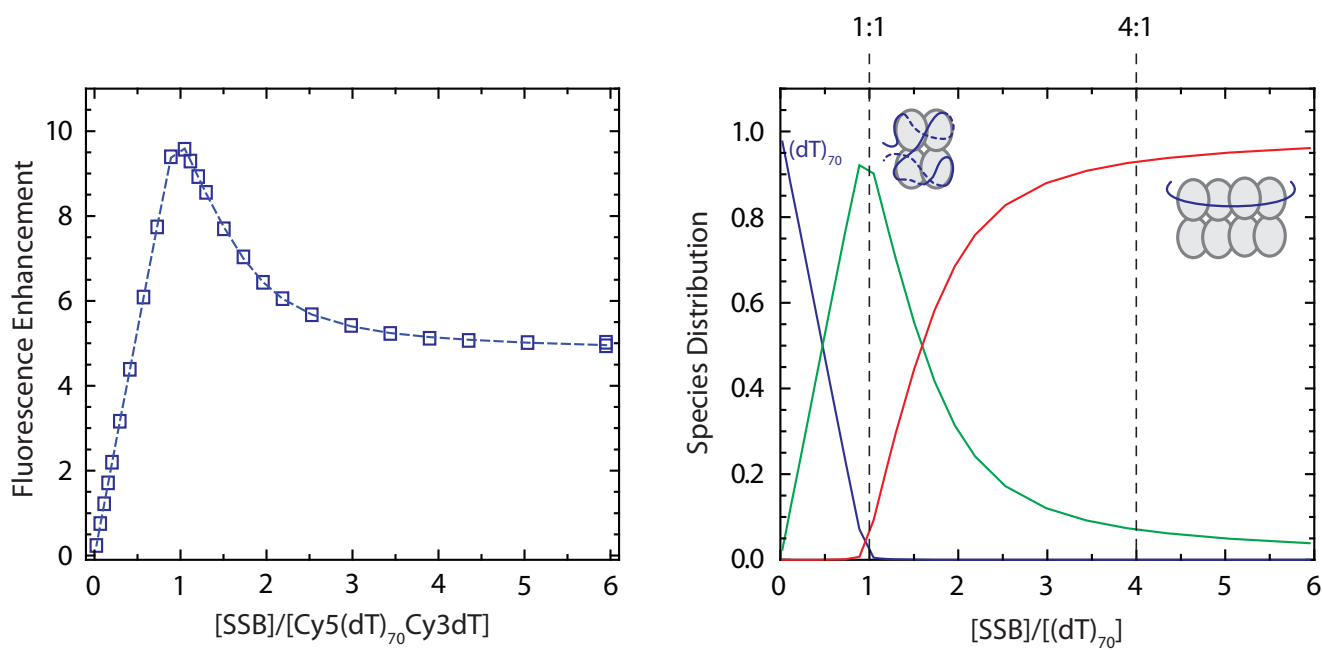

Figure 1 Supp. 6

Supplement: supp [file elife-08193-supp-v1.zip › elife_poa_e08193_Figure_1_figure_supplement_6.pdf]
